# Supplementary material for: Exploring the Potential of White-Rot Fungi Exudates on the Amelioration of Salinized Soils
Source: MDPI journal article supplement (doi:10.3390/agriculture13020382), 2023-02-05
Supplement: s1 [file s1]

# Exploring the Potential of White-Rot Fungi Exudates on the Amelioration of Salinized Soils

João Borges <sup>1</sup>, Paulo Cardoso <sup>2</sup>, Isabel Lopes <sup>2</sup>, Etelvina Figueira <sup>2</sup>, Cátia Venâncio <sup>2\*</sup>

Supplementary data

Number of Tables: 3

Number of Figures: 2

Supplementary Table S1: Characteristics of the soil used in the germination and seedling growth assays with *Lens culinaris*. Presented as average values. C<sub>org</sub> – organic carbon content; N – nitrogen content; OM – organic matter content (%); WHC<sub>max</sub> – maximum water holding capacity.

| Tested soil          | Natural soil (NS)                                                                    | LUFA 2.2                                                                     |
|----------------------|--------------------------------------------------------------------------------------|------------------------------------------------------------------------------|
| Climate zone         | Temperate (Mediterranean)                                                            | Temperate (Oceanic)                                                          |
|                      | Portugal                                                                             | Germany                                                                      |
| Land use             | Sustainably managed                                                                  | Sustainably managed                                                          |
|                      | (no chemicals; exclusion of grazing; proliferation of endemic vegetation > 20 years) | (no pesticides or organic fertilizers addition >5 years prior to collection) |
| OM (%)               | 3.67 ± 0.40                                                                          | 1.59 ± 0.13                                                                  |
| C <sub>org</sub> (%) | 2.15 ± 0.23                                                                          | 2.2                                                                          |
| N (%)                | 0.32 ± 0.09                                                                          | 0.22                                                                         |
| pH                   | 4.75 ± 0.29                                                                          | 5.5 ± 0.1                                                                    |
| Soil type            | sandy loam                                                                           | sandy loam                                                                   |
| <0.002 (%)           | 9.64 ± 1.39                                                                          | 10.7 ± 1.9                                                                   |
| 0.002 - 0.05 (%)     | 20.60 ± 7.31                                                                         | 15.7 ± 1.1                                                                   |

|                        |                      |                                                                          |
|------------------------|----------------------|--------------------------------------------------------------------------|
| 0.05 - 2.0 (%)         | 69.76 ± 8.42         | 73.6 ± 2.1                                                               |
| WHC <sub>max</sub> (%) | 36.61 ± 3.26         | 44.1 ± 6.0                                                               |
| Reference              | Jurburg et al., 2018 | Land- und Forstwirtschaftliche Untersuchungsanstalt LUFA Speyer, Germany |

Supplementary Table S2: Physico-chemical parameters (conductivity – mScm<sup>-1</sup> and pH) of the exudate solutions obtained from the liquid culture of the two white rot fungi (*Trametes versicolor* and *Pleurotus sajor caju*) mixed with the seawater solutions (mScm<sup>-1</sup>) that were later applied to the soils in the germination and seedling growth assay with *Lens culinaris*.

#### *Pleurotus sajor caju*

| pH                        | Treatments            |                       |                      | Conductivity<br>(mScm <sup>-1</sup> ) | Treatments            |                       |                      |
|---------------------------|-----------------------|-----------------------|----------------------|---------------------------------------|-----------------------|-----------------------|----------------------|
| Exudate proportion        | 26 mScm <sup>-1</sup> | 16 mScm <sup>-1</sup> | 8 mScm <sup>-1</sup> | Exudate proportion                    | 26 mScm <sup>-1</sup> | 16 mScm <sup>-1</sup> | 8 mScm <sup>-1</sup> |
| 0% (CTR-H <sub>2</sub> O) | 7.64                  | 7.24                  | 7.60                 | 0% (CTR-H <sub>2</sub> O)             | 0.14                  | 0.12                  | 0.16                 |
| 1%                        | 8.59                  | 8.43                  | 8.41                 | 1%                                    | 26.90                 | 15.80                 | 8.51                 |
| 6%                        | 8.34                  | 7.98                  | 7.79                 | 6%                                    | 24.40                 | 16.30                 | 7.87                 |
| 12%                       | 7.71                  | 7.16                  | 6.86                 | 12%                                   | 23.40                 | 16.30                 | 8.39                 |

#### *Trametes versicolor*

| pH                 | Treatments            |                       |                      | Conductivity<br>(mScm <sup>-1</sup> ) | Treatments            |                       |                      |
|--------------------|-----------------------|-----------------------|----------------------|---------------------------------------|-----------------------|-----------------------|----------------------|
| Exudate proportion | 26 mScm <sup>-1</sup> | 16 mScm <sup>-1</sup> | 8 mScm <sup>-1</sup> | Exudate proportion                    | 26 mScm <sup>-1</sup> | 16 mScm <sup>-1</sup> | 8 mScm <sup>-1</sup> |

|                           |      |      |      |                           |       |       |      |
|---------------------------|------|------|------|---------------------------|-------|-------|------|
| 0% (CTR-H <sub>2</sub> O) | 5.95 | 7.23 | 5.44 | 0% (CTR-H <sub>2</sub> O) | 0.08  | 0.09  | 0.14 |
| 1%                        | 8.57 | 8.17 | 7.69 | 1%                        | 24.62 | 17.21 | 8.75 |
| 6%                        | 6.72 | 6.67 | 6.30 | 6%                        | 25.25 | 17.99 | 8.73 |
| 12%                       | 6.64 | 6.30 | 5.79 | 12%                       | 25.16 | 17.36 | 8.60 |

Supplementary Table S3: Physico-chemical parameters (conductivity – mScm<sup>-1</sup> and pH) of three random soil samples (average ± standard deviation) collected at the end of the germination and seedling growth assay with *Lens culinaris*. CTR- control; T – salinity treatment; F- fungi elutriate %.

| <i>Trametes versicolor</i> |                                    |             |                                    |             |
|----------------------------|------------------------------------|-------------|------------------------------------|-------------|
|                            | Natural soil                       |             | LUFA 2.2                           |             |
|                            | Conductivity (mScm <sup>-1</sup> ) | pH          | Conductivity (mScm <sup>-1</sup> ) | pH          |
| CTR                        | 0.19 ± 0.01                        | 4.77 ± 0.03 | 0.163 ± 0.006                      | 5.78 ± 0.03 |
| T26                        | 23.13 ± 1.50                       | 4.50 ± 0.11 | 22.99 ± 1.08                       | 5.27 ± 0.04 |
| T26+F1%                    | 23.42 ± 1.13                       | 4.51 ± 0.03 | 24.02 ± 0.38                       | 5.34 ± 0.08 |
| T26+F6%                    | 22.34 ± 0.41                       | 4.56 ± 0.02 | 23.79 ± 0.28                       | 5.32 ± 0.04 |
| T26+F12%                   | 22.24 ± 1.25                       | 4.48 ± 0.12 | 26.08 ± 0.35                       | 5.26 ± 0.03 |
| T16                        | 13.96 ± 0.08                       | 4.21 ± 0.07 | 16.56 ± 0.61                       | 5.34 ± 0.02 |
| T16+F1%                    | 14.37 ± 0.39                       | 4.24 ± 0.04 | 15.28 ± 0.41                       | 5.37 ± 0.03 |
| T16+F6%                    | 15.08 ± 0.46                       | 4.37 ± 0.02 | 14.77 ± 0.39                       | 5.39 ± 0.02 |
| T16+F12%                   | 14.61 ± 0.34                       | 4.32 ± 0.01 | 15.87 ± 0.21                       | 5.43 ± 0.02 |
| T8                         | 8.00 ± 0.58                        | 4.38 ± 0.02 | 9.75 ± 0.42                        | 5.52 ± 0.03 |
| T8+F1%                     | 7.43 ± 0.15                        | 4.49 ± 0.03 | 9.72 ± 0.15                        | 5.52 ± 0.02 |
| T8+F6%                     | 7.34 ± 0.03                        | 4.54 ± 0.02 | 9.64 ± 0.39                        | 5.54 ± 0.03 |

|                             |                                    |             |                                    |             |
|-----------------------------|------------------------------------|-------------|------------------------------------|-------------|
| T8+F12%                     | 7.21 ± 0.05                        | 4.56 ± 0.03 | 9.33 ± 0.30                        | 5.45 ± 0.05 |
| <i>Pleurotus sajor caju</i> |                                    |             |                                    |             |
|                             | Natural soil                       |             | LUFA 2.2                           |             |
|                             | Conductivity (mScm <sup>-1</sup> ) | pH          | Conductivity (mScm <sup>-1</sup> ) | pH          |
| CTR                         | 0.20 ± 0.05                        | 4.71 ± 0.06 | 0.17 ± 0.06                        | 5.92 ± 0.07 |
| T26                         | 21.54 ± 1.86                       | 4.39 ± 0.08 | 26.61 ± 2.29                       | 5.55 ± 0.08 |
| T26+F1%                     | 21.15 ± 0.81                       | 4.36 ± 0.03 | 28.03 ± 1.45                       | 5.58 ± 0.08 |
| T26+F6%                     | 21.12 ± 0.85                       | 4.35 ± 0.06 | 27.36 ± 0.75                       | 5.45 ± 0.06 |
| T26+F12%                    | 20.93 ± 0.63                       | 4.34 ± 0.04 | 27.23 ± 0.33                       | 5.59 ± 0.03 |
| T16                         | 14.25 ± 0.85                       | 4.27 ± 0.07 | 21.54 ± 5.17                       | 5.70 ± 0.04 |
| T16+F1%                     | 13.48 ± 0.23                       | 4.31 ± 0.09 | 18.58 ± 0.26                       | 5.80 ± 0.03 |
| T16+F6%                     | 14.12 ± 0.12                       | 4.50 ± 0.10 | 18.89 ± 0.70                       | 5.81 ± 0.11 |
| T16+F12%                    | 13.72 ± 0.31                       | 4.54 ± 0.06 | 19.02 ± 0.24                       | 5.84 ± 0.02 |
| T8                          | 6.81 ± 0.21                        | 4.67 ± 0.02 | 8.97 ± 0.77                        | 5.94 ± 0.06 |
| T8+F1%                      | 6.44 ± 0.07                        | 4.69 ± 0.03 | 8.75 ± 0.70                        | 5.94 ± 0.02 |
| T8+F6%                      | 6.75 ± 0.07                        | 4.81 ± 0.06 | 9.05 ± 0.37                        | 5.85 ± 0.08 |
| T8+F12%                     | 7.00 ± 0.60                        | 4.81 ± 0.05 | 9.68 ± 0.21                        | 5.96 ± 0.02 |

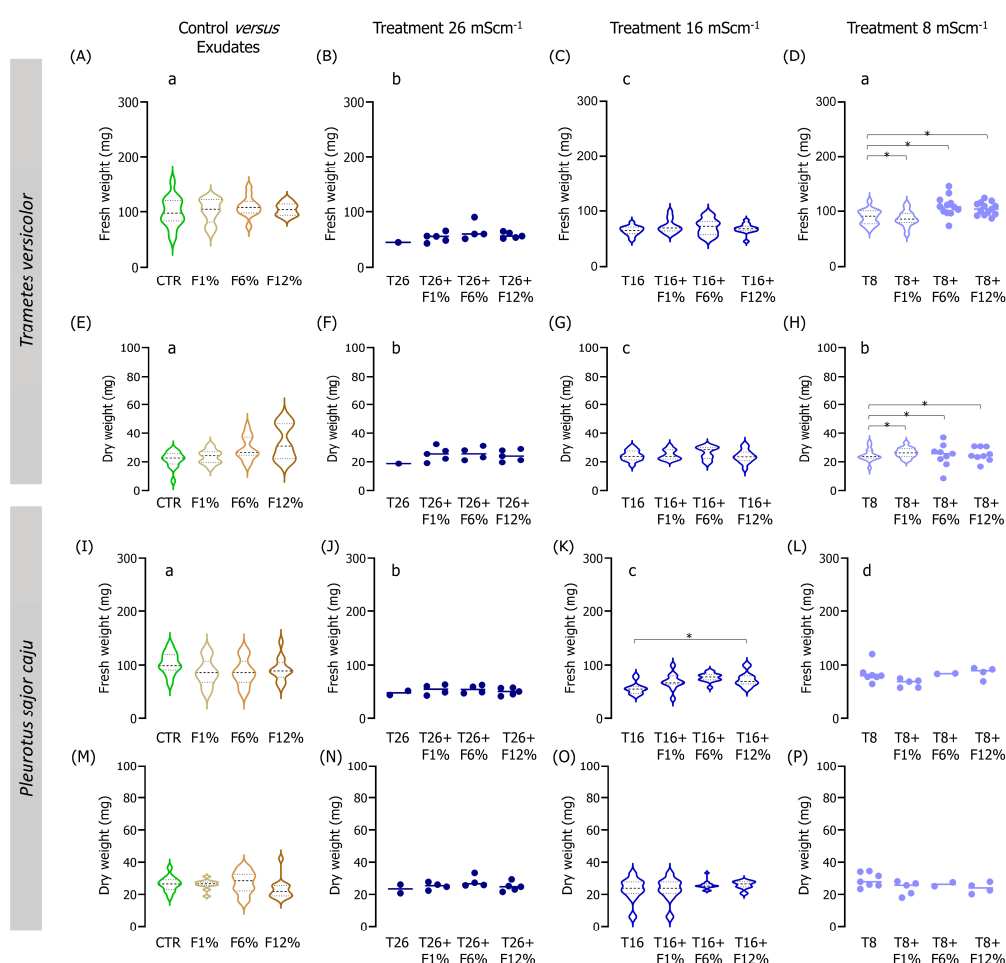

**Figure S1.** Violin plots of the seedling fresh and dry weights of *Lens culinaris* germinated in natural soil salinized at three different levels (8, 16, and 26 mScm<sup>-1</sup>, designated as T8, T16, and T26, respectively) and supplemented with fungi exudates at three levels (1%, 6, and 12%, designated as F1%, F6%, and F12%, respectively). Graphics (A) through (H) present the results obtained from soil moistened with *Trametes versicolor* exudates, and graphics (I) through (P) present the results obtained from soil moistened with *Pleurotus sajor caju* exudates. CTR stands for control soil. Letters (a, b, c, d) stand for homogenous groups assessed only between CTR and the salinity treatments at 96-h in each assessed endpoint (Holm-Sidak,  $p < 0.05$ ). The \* stands for statistical differences between treatments (Holm-Sidak,  $p < 0.05$ ). Note: data represented only by points means that no sufficient points were available for the construction of the violin.

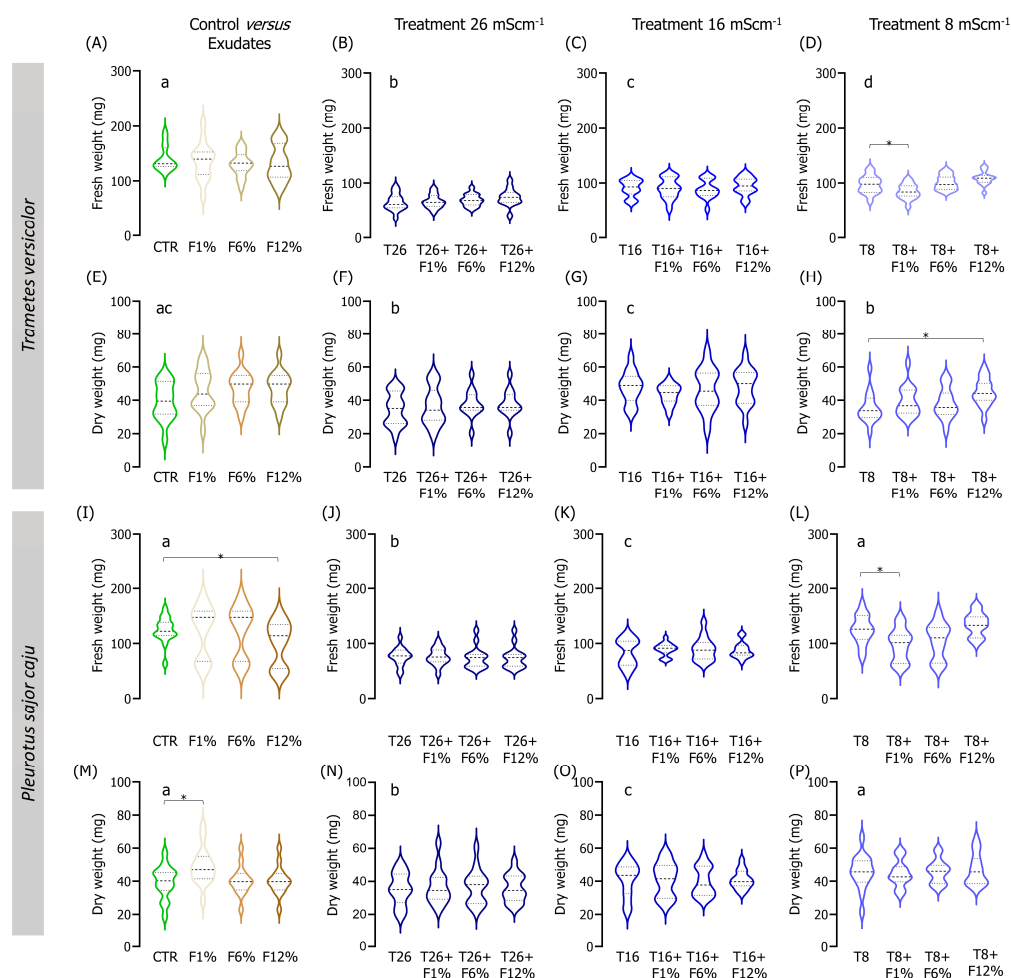

**Figure S2.** Violin plots of the seedling fresh and dry weights of *Lens culinaris* germinated in LUFA 2.2 soil salinized at three different levels (8, 16, and 26 mS.cm<sup>-1</sup>, designated as T8, T16, and T26, respectively) and supplemented with fungi exudates at three levels (1%, 6, and 12%, designated as F1%, F6%, and F12%, respectively). Graphics (A) through (H) present the results obtained from soil moistened with *Trametes versicolor* exudates, and graphics (I) through (P) present the results obtained from soil moistened with *Pleurotus sajor caju* exudates. CTR stands for control soil. Letters (a, b, c, d) stand for homogenous groups assessed only between CTR and the salinity treatments at 96-h in each assessed endpoint (Holm-Sidak,  $p < 0.05$ ). The \* stands for statistical differences between treatments (Holm-Sidak,  $p < 0.05$ ). Note: data represented only by points means that no sufficient points were available for the construction of the violin.
